# Supplementary material for: Ferromagnetic behavior induced by La-doping in SrCo2As2
Source: Royal Society of Chemistry journal article supplement (doi:10.1039/c8tc02503g), 2018-01-01
Supplement: c8tc02503g1.pdf [file c8tc02503g1.pdf]

## **Ferromagnetic behavior induced by La-doping in SrCo<sub>2</sub>As<sub>2</sub>**

### Supporting Information

Shijie Shen, Shangshen Feng\*, Zhiping Lin, Zongpeng Wang, Wenwu Zhong\*

Department of Materials, Taizhou University, Taizhou 318000, China

\*E-mail: fss@tzc.edu.cn, tianmenwenwu@163.com

**Table S1. Summary of Rietveld refinement parameters for nominal  $\text{Sr}_{1-x}\text{La}_x\text{Co}_2\text{As}_2$  ( $x = 0, 0.025, 0.05, 0.075, 0.1, 0.2, 0.3, 0.4, 0.5, 0.6, 0.7, 0.8, 0.9, 1.0$ ).**

| $x$                                     | 0                       | 0.025      | 0.05       | 0.075      | 0.1        | 0.2        | 0.3        |
|-----------------------------------------|-------------------------|------------|------------|------------|------------|------------|------------|
| Main phase (mole ratio)                 | 100%                    | >99.0%     | >99.0%     | >99.0%     | >99.0%     | >99.0%     | >99.0%     |
| LaOCoAs (mole ratio)                    | 0                       | <1.0%      | <1.0%      | <1.0%      | <1.0%      | <1.0%      | <1.0%      |
| Space group                             | <i>I4/mmm</i> (No. 139) |            |            |            |            |            |            |
| $a$ (Å)                                 | 3.9439(1)               | 3.9466(2)  | 3.9475(1)  | 3.9479(1)  | 3.9486(2)  | 3.9512(2)  | 3.9590(1)  |
| $c$ (Å)                                 | 11.8126(3)              | 11.7786(5) | 11.7557(4) | 11.7422(4) | 11.7290(6) | 11.6430(6) | 11.5260(4) |
| $V$ (Å <sup>3</sup> )                   | 183.74(1)               | 183.45(1)  | 183.19(1)  | 183.02(2)  | 182.87(2)  | 181.77(1)  | 180.66(1)  |
| $Z_{\text{As}}$                         | 0.3582 (1)              | 0.3573(1)  | 0.3581(1)  | 0.3575(1)  | 0.3572(1)  | 0.3571(1)  | 0.3577(1)  |
| Co-Co (Å)                               | 2.7888(1)               | 2.7906(1)  | 2.7913(1)  | 2.7916(1)  | 2.7921(1)  | 2.7939(1)  | 2.7995(1)  |
| As-Co-As (°)                            | 107.21(1) × 4           | 106.91(2)  | 107.04(2)  | 106.87(2)  | 106.77(2)  | 106.55(2)  | 106.40(2)  |
|                                         | 114.10 (1) × 2          | 114.72(2)  | 114.45(2)  | 114.82(2)  | 115.03(2)  | 115.48(2)  | 115.80(2)  |
| Co-As-Co (°)                            | 72.79 (1)               | 73.09(2)   | 72.96(1)   | 73.14(1)   | 73.23(2)   | 73.45(2)   | 73.60(2)   |
| Diffractometer                          | PANalytical X'Pert Pro  |            |            |            |            |            |            |
| Radiation type                          | Co K $\alpha$           |            |            |            |            |            |            |
| Wavelength (Å)                          | 1.79026                 |            |            |            |            |            |            |
| Collection Range (° 2 $\theta$ )        | 10 to 130               |            |            |            |            |            |            |
| Step size (° 2 $\theta$ )               | 0.017                   |            |            |            |            |            |            |
| Number of Observations ( $N$ )          | 7059                    | 7059       | 7059       | 7059       | 7059       | 7059       | 7059       |
| Number of structure parameters ( $P1$ ) | 4                       | 4          | 4          | 4          | 4          | 4          | 4          |
| Number of profile parameters ( $P2$ )   | 9                       | 9          | 9          | 9          | 9          | 9          | 9          |
| $R_p$                                   | 2.87%                   | 3.58%      | 2.90%      | 3.19%      | 3.47%      | 4.12%      | 3.62%      |
| $R_{wp}$                                | 3.79%                   | 4.92%      | 4.00%      | 4.53%      | 4.89%      | 5.86%      | 5.15%      |
| $R_{exp}$                               | 1.79%                   | 1.48%      | 1.59%      | 1.57%      | 1.58%      | 1.59%      | 1.64%      |

|          |      |      |      |      |      |      |      |
|----------|------|------|------|------|------|------|------|
| $\chi^2$ | 4.50 | 11.0 | 6.29 | 8.27 | 9.62 | 13.5 | 9.87 |
|----------|------|------|------|------|------|------|------|

Note:  $R_p = \sum |y_{io} - y_{ic}| / \sum |y_{io}|$ ,  $R_{wp} = [\sum w_i (y_{io} - y_{ic})^2 / \sum w_i y_{io}^2]^{1/2}$ ,  $R_{exp} = [(N - P_1 - P_2) / \sum w_i y_{io}^2]^{1/2}$ ,  $\chi^2 = \sum [w_i (y_{io} - y_{ic})^2 / (N - P_1 - P_2)]^{1/2}$ .

| $x$                                     | 0.4                     | 0.5        | 0.6        | 0.7        | 0.8        | 0.9        | 1.0        |
|-----------------------------------------|-------------------------|------------|------------|------------|------------|------------|------------|
| Main phase (mole ratio)                 | 99.0%                   | >99.0%     | >99.0%     | 97.4%      | >99.0%     | 98.4%      | 90.7%      |
| LaOCoAs (mole ratio)                    | 1.0%                    | <1.0%      | <1.0%      | 2.6%       | <1.0%      | 1.6%       | 9.3%       |
| Space group                             | <i>I4/mmm</i> (No. 139) |            |            |            |            |            |            |
| $a$ (Å)                                 | 3.9711(2)               | 3.9768(1)  | 3.9988(1)  | 4.0096(2)  | 4.0210(2)  | 4.0378(2)  | 4.0449(2)  |
| $c$ (Å)                                 | 11.3803(1)              | 11.3002(7) | 11.0502(4) | 10.9318(8) | 10.8019(8) | 10.6085(5) | 10.4999(7) |
| $V$ (Å <sup>3</sup> )                   | 179.46(1)               | 178.71(1)  | 176.70(1)  | 175.75(2)  | 174.65(2)  | 172.96(1)  | 171.80(2)  |
| $Z_{As}$                                | 0.3578(1)               | 0.3588(1)  | 0.3590(1)  | 0.3615(1)  | 0.3608(2)  | 0.3604(1)  | 0.3616(1)  |
| Co-Co (Å)                               | 2.8080(1)               | 2.8120(1)  | 2.8276(1)  | 2.8352(2)  | 2.8433(1)  | 2.8551(1)  | 2.8602(1)  |
| As-Co-As (°)                            | 106.04(3) × 4           | 106.06(3)  | 105.44(2)  | 105.67(3)  | 105.17(4)  | 104.58(3)  | 104.55(3)  |
|                                         | 116.58(3) × 2           | 116.53(3)  | 117.87(2)  | 117.37(3)  | 118.47(4)  | 119.77(3)  | 119.84(3)  |
| Co-As-Co (°)                            | 73.96 (2)               | 73.94 (3)  | 74.56(2)   | 74.33(3)   | 74.83 (3)  | 75.42 (2)  | 75.45 (3)  |
| Diffractometer                          | PANalytical X'Pert Pro  |            |            |            |            |            |            |
| Radiation type                          | Co K $\alpha$           |            |            |            |            |            |            |
| Wavelength (Å)                          | 1.79026                 |            |            |            |            |            |            |
| Collection Range (° 2 $\theta$ )        | 10 to 130               |            |            |            |            |            |            |
| Step size (° 2 $\theta$ )               | 0.017                   |            |            |            |            |            |            |
| Number of Observations ( $N$ )          | 7059                    | 7059       | 7059       | 7059       | 7059       | 7059       | 7059       |
| Number of structure parameters ( $P1$ ) | 4                       | 4          | 4          | 4          | 4          | 4          | 4          |
| Number of profile parameters ( $P2$ )   | 9                       | 9          | 9          | 9          | 9          | 9          | 9          |

|           |       |       |       |       |       |       |       |
|-----------|-------|-------|-------|-------|-------|-------|-------|
| $R_p$     | 3.87% | 3.91% | 3.34% | 3.76% | 4.15% | 3.15% | 2.25% |
| $R_{wp}$  | 5.46% | 5.79% | 4.62% | 5.07% | 5.69% | 4.23% | 2.91% |
| $R_{exp}$ | 1.67% | 1.69% | 1.76% | 1.96% | 1.81% | 2.04% | 1.42% |
| $\chi^2$  | 10.7  | 11.7  | 6.91  | 6.68  | 9.87  | 4.65  | 4.19  |

Note:  $R_p = \frac{\sum |y_{io} - y_{ic}|}{\sum |y_{io}|}$ ,  $R_{wp} = [\frac{\sum w_i (y_{io} - y_{ic})^2}{\sum w_i y_{io}^2}]^{1/2}$ ,  $R_{exp} = [(N - P_I - P_2) / \sum w_i y_{io}^2]^{1/2}$ ,

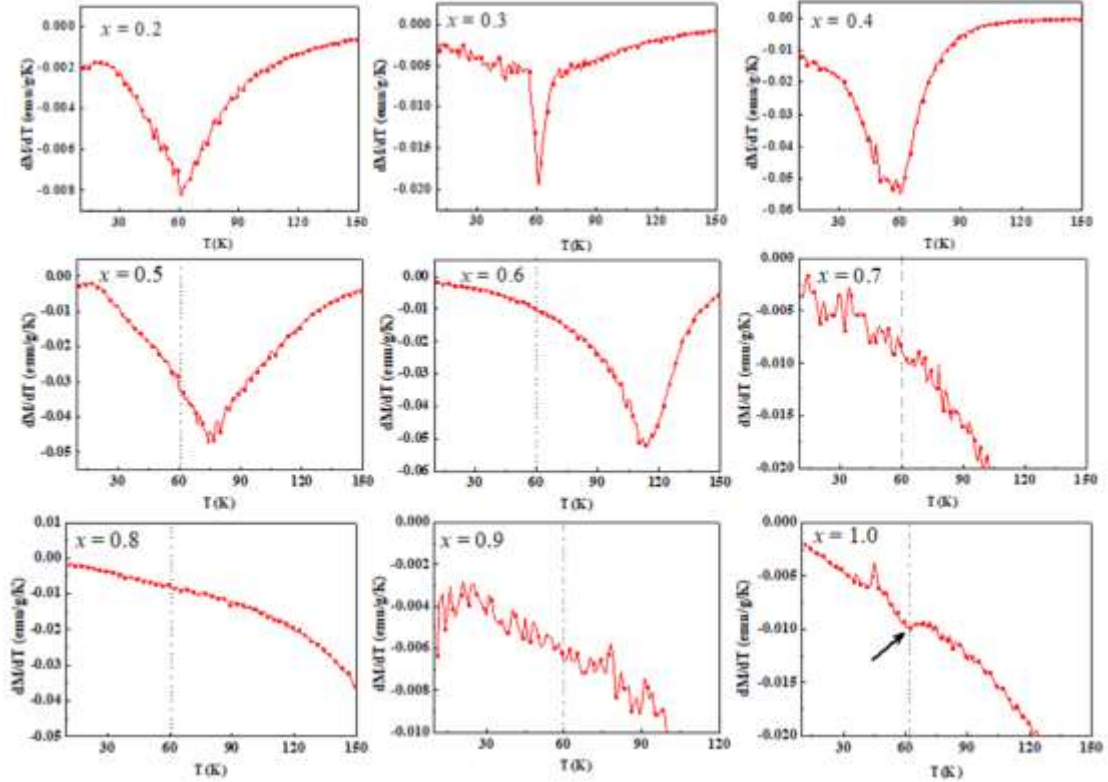

Fig.S1. The differential susceptibility of  $Sr_{1-x}La_xCo_2As_2$  (nominal  $x = 0.2, 0.3, 0.4, 0.5, 0.6, 0.7, 0.8, 0.9, 1.0$ ). The magnetic signal of LaCoOAs is indicated by an arrow.
